# Supplementary material
Source: PubMed Central journal article supplement (PMC9979567)
Supplement: 13054_2023_4327_MOESM2_ESM.pdf [file 13054_2023_4327_MOESM2_ESM.pdf]

**The European guideline on management of major bleeding and coagulopathy following trauma: Sixth edition**

**Additional file 2:** Search bundles, structured literature search strategies and results

**Additional file 2:** Search bundles, structured literature search strategies and results

**Table 1:** Search strategy bundles based on PICOs.

**Table 2:** Search strategy queries used in Ovid MEDLINE for each search bundle.

**Table 3:** Search strategy queries used in CENTRAL via the Cochrane Library.

**Table 4:** Search strategy queries used in Epistemonikos.

**Table 5:** Database search results (number identified) by search bundle.

## The European guideline on management of major bleeding and coagulopathy following trauma: Sixth edition

**Additional file 2:** Search bundles, structured literature search strategies and results

**Table 1:** Search strategy bundles based on PICO(s).

| Search bundle | Topic(s)                                                                           | PICO(s)           |
|---------------|------------------------------------------------------------------------------------|-------------------|
| Bundle 1      | Initial resuscitation, triage, intubation, damage control etc.                     | 16, 12            |
| Bundle 2      | Rapid control of fractures and wounds: tourniquets, packing, binder, fixation etc. | 4, 13             |
| Bundle 3      | Imaging, ultrasound, CT scan etc.                                                  | 7, 8, 24*         |
| Bundle 4      | Point of care tests, blood testing etc.                                            | 9, 10             |
| Bundle 5      | Hypotension, tissue oxygenation, fluid, temperature etc.                           | 11                |
| Bundle 6      | Coagulation, haemostatics etc.                                                     | 14, 15, 19        |
| Bundle 7      | Anticoagulation, thromboprophylaxis, stockings etc.                                | 20, 22            |
| Bundle 8      | Transfusion, platelets, plasma etc.                                                | 1, 16, 18, 21, 25 |
| Bundle 9      | Time to treatment, transportation to treatment, etc.                               | 3                 |
| Bundle 10     | Injury severity, classification systems etc.                                       | 5                 |
| Bundle 11*    | Simulation, teamwork, education, decision making, etc.*                            | 2*                |
| Bundle 12     | Guidelines, bundles, quality control                                               | 17, 23            |

\*Omitted from the search strategy due to the volume of results.

**The European guideline on management of major bleeding and coagulopathy following trauma: Sixth edition**

**Additional file 2:** Search bundles, structured literature search strategies and results

**Table 2:** Search strategy queries used in Ovid MEDLINE for each search bundle.

| Search number | Query                                                                                                                                                                                            | Results<br>03 Dec 2021 | Comments                               |
|---------------|--------------------------------------------------------------------------------------------------------------------------------------------------------------------------------------------------|------------------------|----------------------------------------|
| 1             | exp "wounds and injuries"/                                                                                                                                                                       | 957,562                |                                        |
| 2             | (injur* or trauma*).tw,kf.                                                                                                                                                                       | 1,157,909              |                                        |
| 3             | 1 or 2                                                                                                                                                                                           | 1,698,932              |                                        |
| 4             | exp hemorrhage/                                                                                                                                                                                  | 345,866                |                                        |
| 5             | (bleed* or h?emorrhag* or blood loss or coagulation disorder* or coagulopath* or disseminated intravascular coagulation or DIC).tw,kf.                                                           | 539,868                |                                        |
| 6             | blood coagulation disorders/ or disseminated intravascular coagulation/                                                                                                                          | 26,732                 |                                        |
| 7             | 4 or 5 or 6                                                                                                                                                                                      | 688,046                |                                        |
| 8             | 3 and 7                                                                                                                                                                                          | 113,376                | Narrow population                      |
| 9             | limit 8 to yr="2018 -current"                                                                                                                                                                    | 21,078                 | Narrow population limited to 2018–2021 |
| 10            | exp resuscitation/                                                                                                                                                                               | 103,023                |                                        |
| 11            | exp intubation, intratracheal/                                                                                                                                                                   | 41,102                 |                                        |
| 12            | triage/                                                                                                                                                                                          | 13,701                 |                                        |
| 13            | (resuscitat* or CPR or ventilat*).tw,kf.                                                                                                                                                         | 253,664                |                                        |
| 14            | ((tracheal or intratracheal or endotracheal) and intubation*).tw,kf.                                                                                                                             | 22,517                 |                                        |
| 15            | (triage or overtriage or undertriage).tw,kf.                                                                                                                                                     | 21,735                 |                                        |
| 16            | ((((damage or urgen* or emergen*) adj2 control) or initial care).tw,kf.                                                                                                                          | 5,333                  |                                        |
| 17            | 10 or 11 or 12 or 13 or 14 or 15 or 16                                                                                                                                                           | 348,310                | Bundle 1                               |
| 18            | tourniquets/                                                                                                                                                                                     | 4,099                  |                                        |
| 19            | exp fracture fixation/                                                                                                                                                                           | 66,241                 |                                        |
| 20            | (tourniquet* or pelvi? binder* or pelvi? closure or pelvi? ring* or packing or emboli* or ((device* or wound*) adj3 compression*) or ((fracture* or internal* or external*) adj3 fixat*)).tw,kf. | 227,289                |                                        |
| 21            | exp pelvic bones/                                                                                                                                                                                | 31,753                 |                                        |
| 22            | pubic symphysis/                                                                                                                                                                                 | 1,795                  |                                        |
| 23            | sacroiliac joint/                                                                                                                                                                                | 4,332                  |                                        |
| 24            | exp hip fractures/                                                                                                                                                                               | 26,386                 |                                        |
| 25            | embolization, therapeutic/                                                                                                                                                                       | 34,410                 |                                        |

**The European guideline on management of major bleeding and coagulopathy following trauma: Sixth edition**

**Additional file 2:** Search bundles, structured literature search strategies and results

|    |                                                                                                                                                                                                                                                                                                                                                                                                                                                                          |           |          |
|----|--------------------------------------------------------------------------------------------------------------------------------------------------------------------------------------------------------------------------------------------------------------------------------------------------------------------------------------------------------------------------------------------------------------------------------------------------------------------------|-----------|----------|
| 26 | (pelvi? or hip? or pubic* or sacroiliac* or symphys* or rib or chest wall or ab).ti. and (fracture* or injur* or trauma* or disrupt* or instability).tw,kf.                                                                                                                                                                                                                                                                                                              | 34,120    |          |
| 27 | 18 or 19 or 20 or 21 or 22 or 23 or 24 or 25 or 26                                                                                                                                                                                                                                                                                                                                                                                                                       | 345,796   | Bundle 2 |
| 28 | *diagnostic imaging/                                                                                                                                                                                                                                                                                                                                                                                                                                                     | 24,427    |          |
| 29 | exp tomography, X-ray computed/                                                                                                                                                                                                                                                                                                                                                                                                                                          | 466,370   |          |
| 30 | exp ultrasonography/                                                                                                                                                                                                                                                                                                                                                                                                                                                     | 465,526   |          |
| 31 | angiography/                                                                                                                                                                                                                                                                                                                                                                                                                                                             | 61,323    |          |
| 32 | ((comput* adj2 tomograph*) or CT or ultrasonograph* or sonograph* or eFAST or early FAST or ultrasound* or ultra sound* or imaging).tw,kf.                                                                                                                                                                                                                                                                                                                               | 1,624,967 |          |
| 33 | (angiogra* or angioemboli*).tw,kf.                                                                                                                                                                                                                                                                                                                                                                                                                                       | 217,395   |          |
| 34 | 28 or 29 or 30 or 31 or 32 or 33                                                                                                                                                                                                                                                                                                                                                                                                                                         | 2,131,007 | Bundle 3 |
| 35 | hematologic tests/                                                                                                                                                                                                                                                                                                                                                                                                                                                       | 9,795     |          |
| 36 | exp blood coagulation tests/                                                                                                                                                                                                                                                                                                                                                                                                                                             | 42,866    |          |
| 37 | point-of-care testing/                                                                                                                                                                                                                                                                                                                                                                                                                                                   | 3,193     |          |
| 38 | ((((point of care or clotting or platelet* or laborator* or coagulat* or h?ematocrit or h?emoglobin or h?ematolog*) adj6 (test or tests or testing or parameter* or monitoring or measur* or tool or tools)) or blood test* or POCT or (serum lactate or admission lactate or base deficit or base excess)).tw,kf.                                                                                                                                                       | 217,588   |          |
| 39 | (APTT or activated partial thromboplastin time or thromboelastograph* or TEG or thromboelastometr* or ROTEM or Sonoclot or FIBTEM or multiple electrode impedance aggregometry or MEA or platelet function analyser or PFA-100 or platelet reactivity assay or VerifyNow* or vasodilator-stimulated phosphoprotein or VASP or D-dimer or early coagulation or conventional coagulation or CCT or viscoelastic* or VHA or visco h?emostatic* or viscoh?emostatic*).tw,kf. | 63,678    |          |
| 40 | 35 or 36 or 37 or 38 or 39                                                                                                                                                                                                                                                                                                                                                                                                                                               | 308,177   | Bundle 4 |
| 41 | exp blood pressure/                                                                                                                                                                                                                                                                                                                                                                                                                                                      | 300,643   |          |
| 42 | hematocrit/                                                                                                                                                                                                                                                                                                                                                                                                                                                              | 33,599    |          |
| 43 | exp hypotension/                                                                                                                                                                                                                                                                                                                                                                                                                                                         | 28,881    |          |
| 44 | exp vasoconstrictor agents/                                                                                                                                                                                                                                                                                                                                                                                                                                              | 263,196   |          |
| 45 | exp fluid therapy/                                                                                                                                                                                                                                                                                                                                                                                                                                                       | 21,337    |          |
| 46 | exp hypertonic solutions/                                                                                                                                                                                                                                                                                                                                                                                                                                                | 11,976    |          |
| 47 | exp isotonic solutions/                                                                                                                                                                                                                                                                                                                                                                                                                                                  | 9,651     |          |

**The European guideline on management of major bleeding and coagulopathy following trauma: Sixth edition**

**Additional file 2:** Search bundles, structured literature search strategies and results

|    |                                                                                                                                                                                                                                                                                                                                                                                                                                                                                                                                                                        |           |          |
|----|------------------------------------------------------------------------------------------------------------------------------------------------------------------------------------------------------------------------------------------------------------------------------------------------------------------------------------------------------------------------------------------------------------------------------------------------------------------------------------------------------------------------------------------------------------------------|-----------|----------|
| 48 | exp crystalloid solutions/                                                                                                                                                                                                                                                                                                                                                                                                                                                                                                                                             | 3,883     |          |
| 49 | exp colloids/                                                                                                                                                                                                                                                                                                                                                                                                                                                                                                                                                          | 138,909   |          |
| 50 | erythrocyte transfusion/                                                                                                                                                                                                                                                                                                                                                                                                                                                                                                                                               | 9,582     |          |
| 51 | exp hypothermia, induced/                                                                                                                                                                                                                                                                                                                                                                                                                                                                                                                                              | 21,304    |          |
| 52 | (blood pressure* or h?ematocrit or hypotension or vasopressor* or vasoconstrict* or inotropic agent* or inotropes or fluid therap* or fluid resuscitation* or volume resuscitation* or fluid replacement* or volume replacement* or rehydration therap* or sodium chlorid* or saline solution* or hypertonic solution* or isotonic solution* or hypotonic solution* or cr?stalloid* or colloid* or plasma substitut* or ringer* solution* or ringer* lactat* or blood substitute* or erythrocyte* or hypotherm* or balanced solution or Hartmann or plasmalyte).tw,kf. | 747,618   |          |
| 53 | 41 or 42 or 43 or 44 or 45 or 46 or 47 or 48 or 49 or 50 or 51 or 52                                                                                                                                                                                                                                                                                                                                                                                                                                                                                                   | 1,270,213 | Bundle 5 |
| 54 | exp blood coagulation/                                                                                                                                                                                                                                                                                                                                                                                                                                                                                                                                                 | 61,055    |          |
| 55 | exp hemostasis/                                                                                                                                                                                                                                                                                                                                                                                                                                                                                                                                                        | 117,428   |          |
| 56 | exp hemostatics/                                                                                                                                                                                                                                                                                                                                                                                                                                                                                                                                                       | 146,171   |          |
| 57 | exp fibrinogen/                                                                                                                                                                                                                                                                                                                                                                                                                                                                                                                                                        | 42,135    |          |
| 58 | exp antifibrinolytic agents/                                                                                                                                                                                                                                                                                                                                                                                                                                                                                                                                           | 29,596    |          |
| 59 | tranexamic acid/                                                                                                                                                                                                                                                                                                                                                                                                                                                                                                                                                       | 4,242     |          |
| 60 | prothrombin/                                                                                                                                                                                                                                                                                                                                                                                                                                                                                                                                                           | 10,867    |          |
| 61 | (coagula* or h?emosta* or fibrinogen* or antifibrinolytic* or anti fibrinolytic* or tranexamic acid* or prothrombin* or (blood adj1 clot*)).tw,kf.                                                                                                                                                                                                                                                                                                                                                                                                                     | 238,684   |          |
| 62 | 54 or 55 or 56 or 57 or 58 or 59 or 60 or 61                                                                                                                                                                                                                                                                                                                                                                                                                                                                                                                           | 419,617   | Bundle 6 |
| 63 | exp anticoagulants/                                                                                                                                                                                                                                                                                                                                                                                                                                                                                                                                                    | 232,340   |          |
| 64 | exp platelet aggregation inhibitors/                                                                                                                                                                                                                                                                                                                                                                                                                                                                                                                                   | 129,726   |          |
| 65 | exp factor Xa inhibitors/                                                                                                                                                                                                                                                                                                                                                                                                                                                                                                                                              | 8,624     |          |
| 66 | (anticoagula* or anti coagula* or DOAC* or antiplatelet* or anti platelet* or antithromb* or anti thromb* or anti factor Xa or antifactor Xa or ((platelet* or thrombin* or factor Xa) adj6 inhibitor*) or rivaroxaban or apixaban or edoxaban or betrixaban or dabigatran or andexanet alfa or heparin or TXA or idarucizumab or PCC or PCCs or prothrombin complex concentrate* or reversal or reversing or residual).tw,kf.                                                                                                                                         | 542,214   |          |
| 67 | intermittent pneumatic compression devices/                                                                                                                                                                                                                                                                                                                                                                                                                                                                                                                            | 767       |          |
| 68 | stockings, compression/                                                                                                                                                                                                                                                                                                                                                                                                                                                                                                                                                | 1,658     |          |

**The European guideline on management of major bleeding and coagulopathy following trauma: Sixth edition**

**Additional file 2:** Search bundles, structured literature search strategies and results

|    |                                                                                                                                                                                                                                                                                                            |           |          |
|----|------------------------------------------------------------------------------------------------------------------------------------------------------------------------------------------------------------------------------------------------------------------------------------------------------------|-----------|----------|
| 69 | (thromboprophylaxis or (thrombosis adj1 prevent*) or intermittent pneumatic compression* or stocking* or (vena cava adj2 filter*)).tw,kf.                                                                                                                                                                  | 16,109    |          |
| 70 | 63 or 64 or 65 or 66 or 67 or 68 or 69                                                                                                                                                                                                                                                                     | 767,746   | Bundle 7 |
| 71 | exp plasma/                                                                                                                                                                                                                                                                                                | 29,373    |          |
| 72 | platelet transfusion/                                                                                                                                                                                                                                                                                      | 7,553     |          |
| 73 | exp blood transfusion/                                                                                                                                                                                                                                                                                     | 89,520    |          |
| 74 | blood platelets/                                                                                                                                                                                                                                                                                           | 79,804    |          |
| 75 | calcium chloride/                                                                                                                                                                                                                                                                                          | 7,609     |          |
| 76 | deamino arginine vasopressin/                                                                                                                                                                                                                                                                              | 4,266     |          |
| 77 | (plasma or FFP or erythrocyte* or red blood cell* or platelet* or thrombocyte* or blood transfusion* or blood product*).tw,kf.                                                                                                                                                                             | 1,346,061 |          |
| 78 | (transfusion adj2 (trigger* or mass* or management or requirement*)).tw,kf.                                                                                                                                                                                                                                | 9,697     |          |
| 79 | (cryoprecipitate* or cryo or thrombocytopenia or thrombocytopaenia or calcium chloride or hypocalcemia or hypocalcaemia or desmopressin or PCC or PCCs or prothrombin complex concentrate* or rFVIIa or recombinant factor VIIa or (recombinant activated adj2 factor VII) or FXIII or factor XIII).tw,kf. | 111,014   |          |
| 80 | operative blood salvage/                                                                                                                                                                                                                                                                                   | 390       |          |
| 81 | ((((cell or blood) adj3 salvage) or cell saver or autotransfus* or auto transfus* or (autologous adj3 blood adj3 (transfus* or retransfus*))).tw,kf.                                                                                                                                                       | 4,939     |          |
| 82 | 71 or 72 or 73 or 74 or 75 or 76 or 77 or 78 or 79 or 80 or 81                                                                                                                                                                                                                                             | 1,488,199 | Bundle 8 |
| 83 | time-to-treatment/                                                                                                                                                                                                                                                                                         | 9,141     |          |
| 84 | *emergency service, hospital/                                                                                                                                                                                                                                                                              | 45,530    |          |
| 85 | trauma centers/                                                                                                                                                                                                                                                                                            | 11,940    |          |
| 86 | ((((trauma adj2 (care or centre* or centre* or unit* or facilit*)) and (transport* or transfer* or time or timing or designation)) or time to treatment*).tw,kf.                                                                                                                                           | 19,564    |          |
| 87 | 83 or 84 or 85 or 86                                                                                                                                                                                                                                                                                       | 83,186    | Bundle 9 |
| 88 | exp trauma severity indices/                                                                                                                                                                                                                                                                               | 36,512    |          |
| 89 | ((((injury or trauma or shock) adj1 severity) or ISS or mechanism of injury or magnitude of injury or shock index or (assess* adj3 (high velocity or speed or high energy or fall height)) or ((shock* or ATLS or injur* or trauma*) adj3 classification*)).tw,kf.                                         | 35,229    |          |

## The European guideline on management of major bleeding and coagulopathy following trauma: Sixth edition

### Additional file 2: Search bundles, structured literature search strategies and results

|     |                                                                                                                                                                               |           |                                   |
|-----|-------------------------------------------------------------------------------------------------------------------------------------------------------------------------------|-----------|-----------------------------------|
| 90  | 88 or 89                                                                                                                                                                      | 61,448    | Bundle 10                         |
| 91  | practice guideline/                                                                                                                                                           | 29,316    |                                   |
| 92  | practice guidelines as topic/                                                                                                                                                 | 126,195   |                                   |
| 93  | exp clinical protocols/                                                                                                                                                       | 180,188   |                                   |
| 94  | guideline adherence/                                                                                                                                                          | 34,341    |                                   |
| 95  | decision making/                                                                                                                                                              | 101,000   |                                   |
| 96  | patient care bundles/                                                                                                                                                         | 1,082     |                                   |
| 97  | (guideline* or decision making or protocol* or checklist* or assessment tool* or ((treatment or care or patient) adj2 bundle*) or quality control or quality program*).tw,kf. | 1,146,475 |                                   |
| 98  | ((treat* or therap*) adj3 goal directed).tw,kf.                                                                                                                               | 1,768     |                                   |
| 99  | ((treat* or therap* or care) and algorithm*).tw,kf.                                                                                                                           | 74,546    |                                   |
| 100 | 91 or 92 or 93 or 94 or 95 or 96 or 97 or 98 or 99                                                                                                                            | 1,497,207 | Bundle 12                         |
| 101 | 17 or 27 or 34 or 40 or 53 or 62 or 70 or 82 or 87 or 90 or 100                                                                                                               | 6,999,775 | All bundle interventions          |
| 102 | 9 and 101                                                                                                                                                                     | 14,535    | All bundles and narrow population |
| 103 | epidemiologic studies/                                                                                                                                                        | 8,916     |                                   |
| 104 | observational study/                                                                                                                                                          | 115,701   |                                   |
| 105 | exp cohort studies/                                                                                                                                                           | 2,258,503 |                                   |
| 106 | exp case control studies/                                                                                                                                                     | 1,257,879 |                                   |
| 107 | cross-sectional studies/                                                                                                                                                      | 401,632   |                                   |
| 108 | clinical trial.pt.                                                                                                                                                            | 532,553   |                                   |
| 109 | cohort*.ti,ab.                                                                                                                                                                | 710,565   |                                   |
| 110 | ((follow up or observational or uncontrolled or non randomi?ed or nonrandomi?ed or epidemiologic*) adj3 (study or studies or data)).ti,ab.                                    | 418,327   |                                   |
| 111 | ((longitudinal or retrospective* or prospective* or cross sectional) and (study or studies or review or analys* or data)).ti,ab.                                              | 1,972,613 |                                   |
| 112 | controlled before-after studies/                                                                                                                                              | 668       |                                   |
| 113 | (before adj2 after adj2 (study or studies or data)).ti,ab.                                                                                                                    | 8,564     |                                   |
| 114 | case control*.ti,ab.                                                                                                                                                          | 142,716   |                                   |
| 115 | (cross sectional and (study or studies or review or analys* or data)).ti,ab.                                                                                                  | 398,999   |                                   |
| 116 | 103 or 104 or 105 or 106 or 107 or 108 or 109 or 110 or 111 or 112 or 113 or 114 or 115                                                                                       | 4,235,152 |                                   |
| 117 | randomised controlled trial.pt.                                                                                                                                               | 552,234   |                                   |
| 118 | controlled clinical trial.pt.                                                                                                                                                 | 94,570    |                                   |

## The European guideline on management of major bleeding and coagulopathy following trauma: Sixth edition

### Additional file 2: Search bundles, structured literature search strategies and results

|     |                                                                                                     |           |                                |
|-----|-----------------------------------------------------------------------------------------------------|-----------|--------------------------------|
| 119 | randomi?ed.ti,ab.                                                                                   | 700,684   |                                |
| 120 | placebo.ab.                                                                                         | 223,598   |                                |
| 121 | drug therapy.fs.                                                                                    | 2,410,323 |                                |
| 122 | randomly.ab.                                                                                        | 371,093   |                                |
| 123 | trial.ti,ab.                                                                                        | 672,443   |                                |
| 124 | groups.ab.                                                                                          | 2,279,685 |                                |
| 125 | 117 or 118 or 119 or 120 or 121 or 122 or 123 or 124                                                | 5,245,861 |                                |
| 126 | meta-analysis/                                                                                      | 148,121   |                                |
| 127 | meta-analysis as topic/                                                                             | 20,570    |                                |
| 128 | (meta analy* or metanaly* or metaanaly* or meta regression).ti,ab.                                  | 220,705   |                                |
| 129 | ((systematic* or evidence*) adj3 (review* or overview*)).ti,ab.                                     | 290,199   |                                |
| 130 | (reference list* or bibliograph* or hand search* or manual search* or relevant journals).ab.        | 48,864    |                                |
| 131 | (search strategy or search criteria or systematic search or study selection or data extraction).ab. | 67,322    |                                |
| 132 | (search* adj4 literature).ab.                                                                       | 80,559    |                                |
| 133 | (medline or pubmed or cochrane or embase or scopus or web of science).ab.                           | 274,509   |                                |
| 134 | cochrane.jw.                                                                                        | 15,740    |                                |
| 135 | ((multiple treatment* or indirect or mixed) adj2 comparison*).ti,ab.                                | 3,313     |                                |
| 136 | 126 or 127 or 128 or 129 or 130 or 131 or 132 or 133 or 134 or 135                                  | 556,374   |                                |
| 137 | practice guideline/                                                                                 | 29,316    |                                |
| 138 | practice guidelines as topic/                                                                       | 126,195   |                                |
| 139 | (guideline* or guidance or consensus or recommendation*).ti,ab.                                     | 895,573   |                                |
| 140 | 137 or 138 or 139                                                                                   | 956,213   |                                |
| 141 | 116 or 125 or 136 or 140                                                                            | 8,747,724 |                                |
| 142 | exp animals/not humans.sh.                                                                          | 4,923,990 | Excluding animals by MeSH term |
| 143 | 141 not 142                                                                                         | 7,973,449 | Filter for study-types         |
| 144 | 102 and 143                                                                                         | 8,217     | Full result                    |
| 145 | 9 and 17 and 143                                                                                    | 1,290     | Bundle 1 result                |
| 146 | 9 and 27 and 143                                                                                    | 1,973     | Bundle 2 result                |
| 147 | 9 and 34 and 143                                                                                    | 2,703     | Bundle 3 result                |
| 148 | 9 and 40 and 143                                                                                    | 840       | Bundle 4 result                |
| 149 | 9 and 53 and 143                                                                                    | 1,195     | Bundle 5 result                |



**The European guideline on management of major bleeding and coagulopathy following trauma: Sixth edition**

**Additional file 2:** Search bundles, structured literature search strategies and results

|     |                                                                           |       |                  |
|-----|---------------------------------------------------------------------------|-------|------------------|
| 150 | 9 and 62 and 143                                                          | 1,740 | Bundle 6 result  |
| 151 | 9 and 70 and 143                                                          | 1,586 | Bundle 7 result  |
| 152 | 9 and 82 and 143                                                          | 2,209 | Bundle 8 result  |
| 153 | 9 and 87 and 143                                                          | 559   | Bundle 9 result  |
| 154 | 9 and 90 and 143                                                          | 1,265 | Bundle 10 result |
| 155 | 9 and 100 and 143                                                         | 1,743 | Bundle 12 result |
| 156 | 145 or 146 or 147 or 148 or 149 or 150 or 151 or 152 or 153 or 154 or 155 | 8,217 | Full result      |

**The European guideline on management of major bleeding and coagulopathy following trauma: Sixth edition**

**Additional file 2:** Search bundles, structured literature search strategies and results

**Table 3:** Search strategy queries used in CENTRAL via the Cochrane Library.

| Search number | Query                                                                                                                                                                                                                                                                                                                                                                                   | Results 03 Dec 2021 |
|---------------|-----------------------------------------------------------------------------------------------------------------------------------------------------------------------------------------------------------------------------------------------------------------------------------------------------------------------------------------------------------------------------------------|---------------------|
| #1            | MeSH descriptor: [Wounds and Injuries] explode all trees                                                                                                                                                                                                                                                                                                                                | 27708               |
| #2            | (injur* or trauma*):ti,ab,kw                                                                                                                                                                                                                                                                                                                                                            | 81064               |
| #3            | #1 or #2                                                                                                                                                                                                                                                                                                                                                                                | 90944               |
| #4            | MeSH descriptor: [Hemorrhage] explode all trees                                                                                                                                                                                                                                                                                                                                         | 15149               |
| #5            | (bleed* or haemorrhag* or hemorrhag* or "blood loss"):ti,ab,kw                                                                                                                                                                                                                                                                                                                          | 76662               |
| #6            | #4 or #5                                                                                                                                                                                                                                                                                                                                                                                | 77921               |
| #7            | #3 and #6                                                                                                                                                                                                                                                                                                                                                                               | 7702                |
| #8            | MeSH descriptor: [Multiple Trauma] explode all trees                                                                                                                                                                                                                                                                                                                                    | 244                 |
| #9            | ((multiple or severe* or serious* or penetrat* or blunt or torso or abdominal or pelvic or pelvis or ISS or critical* or major or "life threatening" or thoracic or abdominal or urological or skeletal or genitourinary) NEAR/4 (injur* or trauma*)) or polytrauma* or (poly NEXT trauma*) or (trauma* NEAR/2 injur*) or ((resuscitat* or shock) NEAR/10 (injur* or trauma*)):ti,ab,kw | 14197               |
| #10           | #8 or #9                                                                                                                                                                                                                                                                                                                                                                                | 14207               |
| #11           | #7 or #10 with Publication Year from 2018 to 2021, in Trials                                                                                                                                                                                                                                                                                                                            | 6268                |
| #12           | MeSH descriptor: [Resuscitation] explode all trees                                                                                                                                                                                                                                                                                                                                      | 5417                |
| #13           | MeSH descriptor: [Intubation, Intratracheal] explode all trees                                                                                                                                                                                                                                                                                                                          | 4628                |
| #14           | MeSH descriptor: [Triage] explode all trees                                                                                                                                                                                                                                                                                                                                             | 316                 |
| #15           | (resuscitat* or CPR or ventilat*):ti,ab,kw                                                                                                                                                                                                                                                                                                                                              | 43533               |
| #16           | ((tracheal or intratracheal or endotracheal) and intubation*):ti,ab,kw                                                                                                                                                                                                                                                                                                                  | 11386               |
| #17           | (triage or overtriage or undertriage):ti,ab,kw                                                                                                                                                                                                                                                                                                                                          | 1770                |
| #18           | ((damage or urgen* or emergen*) NEAR/2 control) or "initial care":ti,ab,kw                                                                                                                                                                                                                                                                                                              | 385                 |
| #19           | #12 or #13 or #14 or #15 or #16 or #17 or #18                                                                                                                                                                                                                                                                                                                                           | 53862               |
| #20           | MeSH descriptor: [Tourniquets] explode all trees                                                                                                                                                                                                                                                                                                                                        | 560                 |
| #21           | MeSH descriptor: [Fracture Fixation] explode all trees                                                                                                                                                                                                                                                                                                                                  | 1878                |
| #22           | (tourniquet* or (pelvi* NEXT binder*) or (pelvi* NEXT closure) or (pelvi* NEXT ring*) or packing or emboli* or ((device* or wound*) NEAR/3 compression*) or ((fracture* or internal* or external*) NEAR/3 fixat*)):ti,ab,kw                                                                                                                                                             | 23026               |
| #23           | MeSH descriptor: [Pelvic Bones] explode all trees                                                                                                                                                                                                                                                                                                                                       | 564                 |
| #24           | MeSH descriptor: [Pubic Symphysis] explode all trees                                                                                                                                                                                                                                                                                                                                    | 14                  |
| #25           | MeSH descriptor: [Sacroiliac Joint] explode all trees                                                                                                                                                                                                                                                                                                                                   | 117                 |

## The European guideline on management of major bleeding and coagulopathy following trauma: Sixth edition

### Additional file 2: Search bundles, structured literature search strategies and results

|     |                                                                                                                                                                                                                                                                                                                                                                                                                                                                                                                                                 |        |
|-----|-------------------------------------------------------------------------------------------------------------------------------------------------------------------------------------------------------------------------------------------------------------------------------------------------------------------------------------------------------------------------------------------------------------------------------------------------------------------------------------------------------------------------------------------------|--------|
| #26 | MeSH descriptor: [Hip Fractures] explode all trees                                                                                                                                                                                                                                                                                                                                                                                                                                                                                              | 1788   |
| #27 | MeSH descriptor: [Embolization, Therapeutic] explode all trees                                                                                                                                                                                                                                                                                                                                                                                                                                                                                  | 825    |
| #28 | (pelvic or pelvis or hip or hips or pubic* or sacroiliac* or symphys* or rib or "chest wall" or ab):ti and (fracture* or injur* or trauma* or disrupt* or instability):ti,ab,kw                                                                                                                                                                                                                                                                                                                                                                 | 4169   |
| #29 | #20 or #21 or #22 or #23 or #24 or #25 or #26 or #27 or #28                                                                                                                                                                                                                                                                                                                                                                                                                                                                                     | 27898  |
| #30 | MeSH descriptor: [Tomography, X-Ray Computed] explode all trees                                                                                                                                                                                                                                                                                                                                                                                                                                                                                 | 5364   |
| #31 | MeSH descriptor: [Ultrasonography] explode all trees                                                                                                                                                                                                                                                                                                                                                                                                                                                                                            | 14448  |
| #32 | MeSH descriptor: [Angiography] explode all trees                                                                                                                                                                                                                                                                                                                                                                                                                                                                                                | 7497   |
| #33 | ((comput* NEAR/2 tomograph*) or CT or ultrasonograph* or sonograph* or eFAST or "early FAST" or ultrasound* or (ultra NEXT sound*) or imaging):ti,ab,kw                                                                                                                                                                                                                                                                                                                                                                                         | 181407 |
| #34 | (angiogra* or angioemboli*):ti,ab,kw                                                                                                                                                                                                                                                                                                                                                                                                                                                                                                            | 20230  |
| #35 | #30 or #31 or #32 or #33 or #34                                                                                                                                                                                                                                                                                                                                                                                                                                                                                                                 | 194357 |
| #36 | MeSH descriptor: [Hematologic Tests] explode all trees                                                                                                                                                                                                                                                                                                                                                                                                                                                                                          | 12070  |
| #37 | MeSH descriptor: [Blood Coagulation Tests] explode all trees                                                                                                                                                                                                                                                                                                                                                                                                                                                                                    | 2089   |
| #38 | MeSH descriptor: [Point-of-Care Testing] explode all trees                                                                                                                                                                                                                                                                                                                                                                                                                                                                                      | 95     |
| #39 | ((("point of care" or clotting or platelet* or laborator* or coagulat* or hematocrit or haematocrit or hemoglobin or haemoglobin or hematolog* or haematolog*) NEAR/6 (test or tests or testing or parameter* or monitoring or measur* or tool or tools)) or (blood NEXT test*) or POCT or ("serum lactate" or "admission lactate" or "base deficit" or "base excess")):ti,ab,kw                                                                                                                                                                | 43333  |
| #40 | (APTT or "activated partial thromboplastin time" or thromboelastograph* or TEG or thromboelastometr* or ROTEM or Sonoclot or FIBTEM or "multiple electrode impedance aggregometry" or MEA or "platelet function analyser" or PFA-100 or "platelet reactivity assay" or VerifyNow* or "vasodilator stimulated phosphoprotein" or VASP or D-dimer or "early coagulation" or "conventional coagulation" or CCT or viscoelastic* or VHA or (visco NEXT haemostatic*) or (visco NEXT hemostatic*) or viscohaemostatic* or viscohemostatic*):ti,ab,kw | 8030   |
| #41 | #36 or #37 or #38 or #39 or #40                                                                                                                                                                                                                                                                                                                                                                                                                                                                                                                 | 58488  |
| #42 | MeSH descriptor: [Blood Pressure] explode all trees                                                                                                                                                                                                                                                                                                                                                                                                                                                                                             | 28306  |
| #43 | MeSH descriptor: [Hematocrit] explode all trees                                                                                                                                                                                                                                                                                                                                                                                                                                                                                                 | 1565   |
| #44 | MeSH descriptor: [Hypotension] explode all trees                                                                                                                                                                                                                                                                                                                                                                                                                                                                                                | 2325   |
| #45 | MeSH descriptor: [Vasoconstrictor Agents] explode all trees                                                                                                                                                                                                                                                                                                                                                                                                                                                                                     | 1882   |
| #46 | MeSH descriptor: [Fluid Therapy] explode all trees                                                                                                                                                                                                                                                                                                                                                                                                                                                                                              | 1770   |
| #47 | MeSH descriptor: [Hypertonic Solutions] explode all trees                                                                                                                                                                                                                                                                                                                                                                                                                                                                                       | 732    |
| #48 | MeSH descriptor: [Isotonic Solutions] explode all trees                                                                                                                                                                                                                                                                                                                                                                                                                                                                                         | 1047   |
| #49 | MeSH descriptor: [Crystalloid Solutions] explode all trees                                                                                                                                                                                                                                                                                                                                                                                                                                                                                      | 650    |

## The European guideline on management of major bleeding and coagulopathy following trauma: Sixth edition

### Additional file 2: Search bundles, structured literature search strategies and results

|     |                                                                                                                                                                                                                                                                                                                                                                                                                                                                                                                                                                                                                                                                                                                                 |        |
|-----|---------------------------------------------------------------------------------------------------------------------------------------------------------------------------------------------------------------------------------------------------------------------------------------------------------------------------------------------------------------------------------------------------------------------------------------------------------------------------------------------------------------------------------------------------------------------------------------------------------------------------------------------------------------------------------------------------------------------------------|--------|
| #50 | MeSH descriptor: [Colloids] explode all trees                                                                                                                                                                                                                                                                                                                                                                                                                                                                                                                                                                                                                                                                                   | 6928   |
| #51 | MeSH descriptor: [Erythrocyte Transfusion] explode all trees                                                                                                                                                                                                                                                                                                                                                                                                                                                                                                                                                                                                                                                                    | 636    |
| #52 | MeSH descriptor: [Hypothermia, Induced] explode all trees                                                                                                                                                                                                                                                                                                                                                                                                                                                                                                                                                                                                                                                                       | 978    |
| #53 | ((blood NEXT pressure*) or hematocrit or haematocrit or hypotension or vasopressor* or vasoconstrict* or (inotropic NEXT agent*) or inotropes or (fluid NEXT therap*) or (fluid NEXT resuscitation*) or (volume NEXT resuscitation*) or (fluid NEXT replacement*) or (volume NEXT replacement*) or (rehydration NEXT therap*) or (sodium NEXT chlorid*) or (saline NEXT solution*) or (hypertonic NEXT solution*) or (isotonic NEXT solution*) or (hypotonic NEXT solution*) or cristalloid* or crystalloid* or colloid* or (plasma NEXT substitut*) or (ringer* NEXT solution*) or (ringer* NEXT lactat*) or (blood NEXT substitute*) or erythrocyte* or hypotherm* or "balanced solution" or Hartmann or plasmalyte):ti,ab,kw | 146190 |
| #54 | #42 or #43 or #44 or #45 or #46 or #47 or #48 or #49 or #50 or #51 or #52 or #53                                                                                                                                                                                                                                                                                                                                                                                                                                                                                                                                                                                                                                                | 153068 |
| #55 | MeSH descriptor: [Blood Coagulation] explode all trees                                                                                                                                                                                                                                                                                                                                                                                                                                                                                                                                                                                                                                                                          | 2415   |
| #56 | MeSH descriptor: [Hemostasis] explode all trees                                                                                                                                                                                                                                                                                                                                                                                                                                                                                                                                                                                                                                                                                 | 4990   |
| #57 | MeSH descriptor: [Hemostatics] explode all trees                                                                                                                                                                                                                                                                                                                                                                                                                                                                                                                                                                                                                                                                                | 1806   |
| #58 | MeSH descriptor: [Fibrinogen] explode all trees                                                                                                                                                                                                                                                                                                                                                                                                                                                                                                                                                                                                                                                                                 | 1745   |
| #59 | MeSH descriptor: [Antifibrinolytic Agents] explode all trees                                                                                                                                                                                                                                                                                                                                                                                                                                                                                                                                                                                                                                                                    | 858    |
| #60 | MeSH descriptor: [Tranexamic Acid] explode all trees                                                                                                                                                                                                                                                                                                                                                                                                                                                                                                                                                                                                                                                                            | 1232   |
| #61 | MeSH descriptor: [Prothrombin] explode all trees                                                                                                                                                                                                                                                                                                                                                                                                                                                                                                                                                                                                                                                                                | 389    |
| #62 | (coagula* or haemosta* or hemosta* or fibrinogen* or antifibrinolytic* or (anti NEXT fibrinolytic*) or (tranexamic NEXT acid*) or prothrombin* or (blood NEXT clot*)):ti,ab,kw                                                                                                                                                                                                                                                                                                                                                                                                                                                                                                                                                  | 31482  |
| #63 | #55 or #56 or #57 or #58 or #59 or #60 or #61 or #62                                                                                                                                                                                                                                                                                                                                                                                                                                                                                                                                                                                                                                                                            | 33352  |
| #64 | MeSH descriptor: [Anticoagulants] explode all trees                                                                                                                                                                                                                                                                                                                                                                                                                                                                                                                                                                                                                                                                             | 4876   |
| #54 | #42 or #43 or #44 or #45 or #46 or #47 or #48 or #49 or #50 or #51 or #52 or #53                                                                                                                                                                                                                                                                                                                                                                                                                                                                                                                                                                                                                                                | 153068 |
| #66 | MeSH descriptor: [Factor Xa Inhibitors] explode all trees                                                                                                                                                                                                                                                                                                                                                                                                                                                                                                                                                                                                                                                                       | 608    |
| #67 | (anticoagula* or (anti NEXT coagula*) or DOAC* or antiplatelet* or (anti NEXT platelet*) or antithromb* or (anti NEXT thromb*) or "antifactor Xa" or "anti factor Xa" or ((platelet* or thrombin* or "factor Xa") NEAR/6 inhibitor*) or rivaroxaban or apixaban or edoxaban or betrixaban or dabigatran or "andexanet alfa" or heparin or TXA or idarucizumab or PCC or PCCs or (prothrombin NEXT complex NEXT concentrate*) or reversal or reversing or residual):ti,ab,kw                                                                                                                                                                                                                                                     | 60273  |
| #68 | MeSH descriptor: [Intermittent Pneumatic Compression Devices] explode all trees                                                                                                                                                                                                                                                                                                                                                                                                                                                                                                                                                                                                                                                 | 153    |
| #69 | MeSH descriptor: [Stockings, Compression] explode all trees                                                                                                                                                                                                                                                                                                                                                                                                                                                                                                                                                                                                                                                                     | 268    |
| #70 | (thromboprophylaxis or (thrombosis NEAR/1 prevent*) or (intermittent NEXT pneumatic NEXT compression*) or stocking* or ("vena cava" NEAR/2 filter*)):ti,ab,kw                                                                                                                                                                                                                                                                                                                                                                                                                                                                                                                                                                   | 3994   |

## The European guideline on management of major bleeding and coagulopathy following trauma: Sixth edition

### Additional file 2: Search bundles, structured literature search strategies and results

|     |                                                                                                                                                                                                                                                                                                                                      |        |
|-----|--------------------------------------------------------------------------------------------------------------------------------------------------------------------------------------------------------------------------------------------------------------------------------------------------------------------------------------|--------|
| #71 | #64 or #65 or #66 or #67 or #68 or #69 or #70                                                                                                                                                                                                                                                                                        | 62213  |
| #72 | MeSH descriptor: [Plasma] explode all trees                                                                                                                                                                                                                                                                                          | 1186   |
| #73 | MeSH descriptor: [Platelet Transfusion] explode all trees                                                                                                                                                                                                                                                                            | 333    |
| #74 | MeSH descriptor: [Blood Transfusion] explode all trees                                                                                                                                                                                                                                                                               | 3702   |
| #75 | MeSH descriptor: [Blood Platelets] explode all trees                                                                                                                                                                                                                                                                                 | 2022   |
| #76 | MeSH descriptor: [Calcium Chloride] explode all trees                                                                                                                                                                                                                                                                                | 92     |
| #77 | MeSH descriptor: [Deamino Arginine Vasopressin] explode all trees                                                                                                                                                                                                                                                                    | 398    |
| #78 | (plasma or FFP or erythrocyte* or (red NEXT blood NEXT cell*) or platelet* or thrombocyte* or (blood NEXT transfusion*) or (blood NEXT product*)):ti,ab,kw                                                                                                                                                                           | 145799 |
| #79 | (transfusion NEAR/2 (trigger* or mass* or management or requirement*)):ti,ab,kw                                                                                                                                                                                                                                                      | 2581   |
| #80 | (cryoprecipitate* or cryo or thrombocytopenia or thrombocytopaenia or "calcium chloride" or hypocalcemia or hypocalcaemia or desmopressin or PCC or PCCs or (prothrombin NEXT complex NEXT concentrate*) or rFVIIa or "recombinant factor VIIa" or ("recombinant activated" NEAR/2 "factor VII") or FXIII or "factor XIII"):ti,ab,kw | 13936  |
| #81 | MeSH descriptor: [Operative Blood Salvage] explode all trees                                                                                                                                                                                                                                                                         | 47     |
| #82 | ((((Cell or blood) NEAR/3 salvage) or "cell saver" or autotransfus* or (auto NEXT transfus*) or (autologous NEAR/3 blood NEAR/3 (transfus* or retransfus*)):ti,ab,kw                                                                                                                                                                 | 1389   |
| #83 | #72 or #73 or #74 or #75 or #76 or #77 or #78 or #79 or #80 or #81 or #82                                                                                                                                                                                                                                                            | 156507 |
| #84 | MeSH descriptor: [Time-to-Treatment] explode all trees                                                                                                                                                                                                                                                                               | 427    |
| #85 | MeSH descriptor: [Emergency Service, Hospital] explode all trees                                                                                                                                                                                                                                                                     | 2665   |
| #86 | MeSH descriptor: [Trauma Centers] explode all trees                                                                                                                                                                                                                                                                                  | 192    |
| #87 | ((((trauma NEAR/2 (care or centre* or centre* or unit* or facilit*)) and (transport* or transfer* or time or timing or designation)) or (time NEAR/2 treatment*)):ti,ab,kw                                                                                                                                                           | 14633  |
| #88 | #84 or #85 or #86 or #87                                                                                                                                                                                                                                                                                                             | 17213  |
| #89 | MeSH descriptor: [Trauma Severity Indices] explode all trees                                                                                                                                                                                                                                                                         | 1259   |
| #90 | ((((injury or trauma or shock) NEXT severity) or ISS or "mechanism of injury" or "magnitude of injury" or "shock index" or (assess* NEXT/3 ("high velocity" or speed or "high energy" or "fall height")) or ((shock* or ATLS or injur* or trauma*) NEXT/3 classification*)):ti,ab,kw                                                 | 3047   |
| #91 | #89 or #90                                                                                                                                                                                                                                                                                                                           | 3533   |
| #92 | MeSH descriptor: [Practice Guidelines as Topic] explode all trees                                                                                                                                                                                                                                                                    | 1670   |
| #93 | MeSH descriptor: [Clinical Protocols] explode all trees                                                                                                                                                                                                                                                                              | 19416  |
| #94 | MeSH descriptor: [Decision Making] explode all trees                                                                                                                                                                                                                                                                                 | 4241   |
| #95 | MeSH descriptor: [Guideline Adherence] explode all trees                                                                                                                                                                                                                                                                             | 1112   |
| #96 | MeSH descriptor: [Patient Care Bundles] explode all trees                                                                                                                                                                                                                                                                            | 37     |

**The European guideline on management of major bleeding and coagulopathy following trauma: Sixth edition**

**Additional file 2:** Search bundles, structured literature search strategies and results

|      |                                                                                                                                                                                                     |                              |
|------|-----------------------------------------------------------------------------------------------------------------------------------------------------------------------------------------------------|------------------------------|
| #97  | (guideline* or "decision making" or protocol* or checklist* or (assessment NEXT tool*) or ((treatment or care or patient) NEAR/2 bundle*) or "quality control" or (quality NEXT program*)):ti,ab,kw | 195920                       |
| #98  | ((treat* or therap* or care) NEAR/3 ("goal directed")):ti,ab,kw                                                                                                                                     | 746                          |
| #99  | ((treat* or therap* or care) NEAR/10 algorithm*):ti,ab,kw                                                                                                                                           | 3614                         |
| #100 | #92 or #93 or #94 or #95 or #96 or #97 or #98 or #99                                                                                                                                                | 200464                       |
| #101 | #19 or #29 or #35 or #41 or #54 or #63 or #71 or #83 or #88 or #91 or #100                                                                                                                          | 689576                       |
| #102 | #11 and #101                                                                                                                                                                                        | 4018 Full result             |
| #103 | #11 and #19                                                                                                                                                                                         | 878 Bundle 1                 |
| #104 | #11 and #29                                                                                                                                                                                         | 559 Bundle 2                 |
| #105 | #11 and #35                                                                                                                                                                                         | 1153 Bundle 3                |
| #106 | #11 and #41                                                                                                                                                                                         | 332 Bundle 4                 |
| #107 | #11 and #54                                                                                                                                                                                         | 837 Bundle 5                 |
| #108 | #11 and #63                                                                                                                                                                                         | 611 Bundle 6                 |
| #109 | #11 and #71                                                                                                                                                                                         | 548 Bundle 7                 |
| #110 | #11 and #83                                                                                                                                                                                         | 827 Bundle 8                 |
| #111 | #11 and #88                                                                                                                                                                                         | 183 Bundle 9                 |
| #112 | #11 and #91                                                                                                                                                                                         | 375 Bundle 10                |
| #113 | #11 and #100                                                                                                                                                                                        | 1369 Bundle 12               |
| #114 | #103 or #104 or #105 or #106 or #107 or #108 or #109 or #110 or #111 or #112 or #113                                                                                                                | 4018 All bundles full result |

**The European guideline on management of major bleeding and coagulopathy following trauma: Sixth edition**

**Additional file 2:** Search bundles, structured literature search strategies and results

**Table 4:** Search strategy queries used in Epistemonikos.

Systematic reviews, 2018-2021

| Search number | Query                                                                                                                                                                                                                                                                                                                                                                                                                                                                                                                                                                                                                                                                                               | Results 03 Dec 2021 |
|---------------|-----------------------------------------------------------------------------------------------------------------------------------------------------------------------------------------------------------------------------------------------------------------------------------------------------------------------------------------------------------------------------------------------------------------------------------------------------------------------------------------------------------------------------------------------------------------------------------------------------------------------------------------------------------------------------------------------------|---------------------|
| #1            | ((bleed* OR haemorrhag* OR hemorrhag* OR “blood loss”)<br>AND<br>(injur* OR trauma*)<br>AND<br>(care OR treatment OR control OR therapy OR test* OR anticoagula* OR coagula* OR imaging OR transfusion* OR ultrasound OR CT OR timing OR fluid* OR hypotension OR fracture*))<br><br>OR<br>(“multiple trauma” OR “multiple injury” OR “multiple injuries” OR “major trauma” OR “major injury” OR “major injuries” OR “severe trauma” OR “severe injury” OR “severe injury” OR polytrauma OR “poly trauma”)<br>AND<br>(care OR treatment OR control OR therapy OR test* OR anticoagula* OR coagula* OR imaging OR transfusion* OR ultrasound OR CT OR timing OR fluid* OR hypotension OR fracture*)) | 598 references      |

**The European guideline on management of major bleeding and coagulopathy following trauma: Sixth edition**

**Additional file 2:** Search bundles, structured literature search strategies and results

**Table 5:** Database search results (number identified) by search bundle.

| <b>Search bundle</b>    | <b>Raw results</b> |                |              |                      | <b>Screened results</b> |                     |
|-------------------------|--------------------|----------------|--------------|----------------------|-------------------------|---------------------|
|                         | <i>Medline</i>     | <i>CENTRAL</i> | <i>Total</i> | <i>De-duplicated</i> | <i>Excluded</i>         | <i>Pre-selected</i> |
| Bundle 1                | 1290               | 878            | 2168         | 2112                 | 1773                    | 237                 |
| Bundle 2                | 1973               | 559            | 2532         | 2430                 | 2159                    | 189                 |
| Bundle 3                | 2703               | 1153           | 3856         | 3780                 | 3400                    | 267                 |
| Bundle 4                | 840                | 332            | 1172         | 1141                 | 977                     | 121                 |
| Bundle 5                | 1195               | 837            | 2032         | 1972                 | 1735                    | 121                 |
| Bundle 6                | 1740               | 611            | 2351         | 2254                 | 1987                    | 141                 |
| Bundle 7                | 1586               | 548            | 2134         | 2049                 | 1780                    | 152                 |
| Bundle 8                | 2209               | 827            | 3036         | 2943                 | 2272                    | 528                 |
| Bundle 9                | 559                | 183            | 742          | 735                  | 672                     | 36                  |
| Bundle 10               | 1265               | 375            | 1640         | 1608                 | 1414                    | 133                 |
| Bundle 12               | 1743               | 1369           | 3112         | 3027                 | 2772                    | 102                 |
| Epistemonikos           |                    |                | 598          | 598                  | 431                     | 163                 |
| <b>Total references</b> |                    |                | <b>25373</b> | <b>24649</b>         | <b>21372</b>            | <b>2190</b>         |

The search in the Cochrane Central Register of Controlled Trials (CENTRAL) database was performed with a broad population (patients with trauma and haemorrhage, or patients with multiple, severe, major trauma/injury [without mentioning haemorrhage]).



**The European guideline on management of major bleeding and coagulopathy following trauma: Sixth edition**

**Additional file 2:** Search bundles, structured literature search strategies and results

The search in Medline (OvidSP) was performed with a narrower population (patients with trauma and haemorrhage) and with filters for relevant study types to increase precision.

Bundle 11 was omitted from the search strategy due to the volume of results.
